# Supplementary material for: Patients and Professionals as Partners in Hypertension Care: Qualitative Substudy of a Randomized Controlled Trial Using an Interactive Web-Based System Via Mobile Phone
Source: PubMed Central journal article supplement (PMC8212623; doi:10.2196/26143), 2021-06-03
Supplement: jmir_v23i6e26143_app1.pdf [file jmir_v23i6e26143_app1.pdf]

Code list from Nvivo

(translated from Swedish)

Table 1. Codes for focus group interviews with patients

| <b>Codename</b>                                         | <b>Files<sup>a</sup></b> | <b>References<sup>b</sup></b> |
|---------------------------------------------------------|--------------------------|-------------------------------|
| Communication                                           | 0                        | 0                             |
| The patient more active                                 | 2                        | 8                             |
| A more personal consultation                            | 3                        | 7                             |
| Patient autonomy                                        | 0                        | 0                             |
| Expert in own blood pressure                            | 4                        | 18                            |
| Patient participation                                   | 0                        | 0                             |
| Connecting BP values to activities                      | 4                        | 23                            |
| Taking responsibility for a healthy lifestyle           | 4                        | 35                            |
| Taking responsibility for own BP                        | 0                        | 0                             |
| Contacts health care when values are abnormal           | 2                        | 5                             |
| Taking responsibility for contact with health care      | 3                        | 5                             |
| Taking responsibility for BP monitoring                 | 4                        | 15                            |
| Using the graphs on your own                            | 3                        | 7                             |
| Perceptions about PCC and partnership                   | 0                        | 0                             |
| Perceptions of PCC                                      | 4                        | 14                            |
| Thoughts about what partnership can be                  | 1                        | 1                             |
| Allowed to take time and space                          | 4                        | 10                            |
| Cooperation about BP treatment                          | 0                        | 0                             |
| Focus on BP                                             | 2                        | 2                             |
| Hard to motivate oneself                                | 1                        | 2                             |
| Shared responsibility form health care                  | 1                        | 4                             |
| Wants to be called                                      | 1                        | 2                             |
| Established relationship with trust and professionalism | 4                        | 29                            |
| Feedback from health care is needed                     | 2                        | 8                             |
| Individualized care                                     | 1                        | 1                             |
| Information as support                                  | 1                        | 1                             |
| Shared knowledge                                        | 0                        | 0                             |
| Using the graphs as support in the consultation         | 3                        | 11                            |
| Cooperating with professionals                          | 4                        | 10                            |
| Recieved information from professional                  | 1                        | 1                             |

Table 2. Codes for focus group interviews with health care professionals

| <b>Codename</b>                                       | <b>Files<sup>a</sup></b> | <b>References<sup>b</sup></b> |
|-------------------------------------------------------|--------------------------|-------------------------------|
| Communication                                         | 0                        | 0                             |
| Individualized consultation                           | 2                        | 8                             |
| More equal consultation                               | 1                        | 3                             |
| More holistic consultation                            | 3                        | 7                             |
| The patient more active                               | 2                        | 5                             |
| The patient more passive                              | 1                        | 1                             |
| IT-literacy                                           | 3                        | 9                             |
| Patient autonomy                                      | 0                        | 0                             |
| Expert in own BP                                      | 3                        | 7                             |
| Patient participation                                 | 0                        | 0                             |
| Connecting BP values to activity                      | 1                        | 2                             |
| Takes responsibility for a healthy lifestyle          | 2                        | 5                             |
| Doubts the patient's capability for lifestyle changes | 3                        | 8                             |
| The patient more involved                             | 3                        | 5                             |
| The patients take responsibility for high BP          | 0                        | 0                             |
| Contact health care when values are abnormal          | 1                        | 3                             |
| Excessive measuring is negative                       | 3                        | 7                             |
| Takes responsibility through BP monitoring            | 3                        | 6                             |
| Perceptions of PCC and partnership                    | 0                        | 0                             |
| Thoughts about partnership                            | 3                        | 19                            |
| Thoughts about PCC                                    | 3                        | 23                            |
| Shared knowledge                                      | 0                        | 0                             |
| Cooperation with health care professionals            | 2                        | 3                             |
| Health care based on the patient's preconditions      | 1                        | 3                             |
| The graphs as a support in the consultation           | 3                        | 12                            |
| The patient's knowledge is evident                    | 2                        | 3                             |
| Tool for the professionals                            | 3                        | 11                            |

<sup>a</sup>Each focus group interview is represented by a file.

<sup>b</sup>References represents the number of data extracts coded to each codename.

#### Abbreviations

BP: Blood Pressure

PCC: Person-centered care

This is a Multimedia Appendix to a full manuscript published in the J Med Internet Res. For full copyright and citation information see <http://dx.doi.org/10.2196/jmir.26143>
